# Supplementary material for: Müller glia-derived exosomal miR-9-3p promotes angiogenesis by restricting sphingosine-1-phosphate receptor S1P1 in diabetic retinopathy
Source: PubMed Central journal article supplement — Mol Ther Nucleic Acids. 2021 Dec 17;27:491–504. doi: 10.1016/j.omtn.2021.12.019 (PMC8728524; doi:10.1016/j.omtn.2021.12.019), 2021-12-17
Supplement: mmc1.pdf [file mmc1.pdf]

OMTN, Volume 27

## Supplemental information

**Müller glia-derived exosomal miR-9-3p promotes  
angiogenesis by restricting sphingosine-1-phosphate  
receptor S1P<sub>1</sub> in diabetic retinopathy**

**Yu Liu, Qin Yang, Haixin Fu, Jingfan Wang, Songtao Yuan, Xinsheng Li, Ping Xie, Zizhong Hu, and Qinghuai Liu**

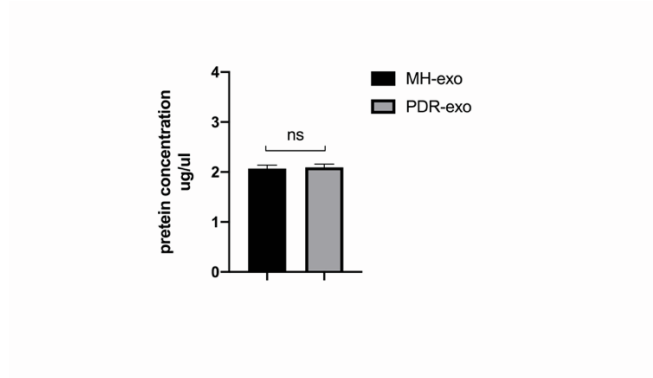

**Supplementary Figure 1 Quantitation of protein level of MH-exo and PDR-exo**

BCA results determined that nonsignificant difference was found in concentration of proteins level of MH-exo and PDR-exo ( $p>0.05$ ).

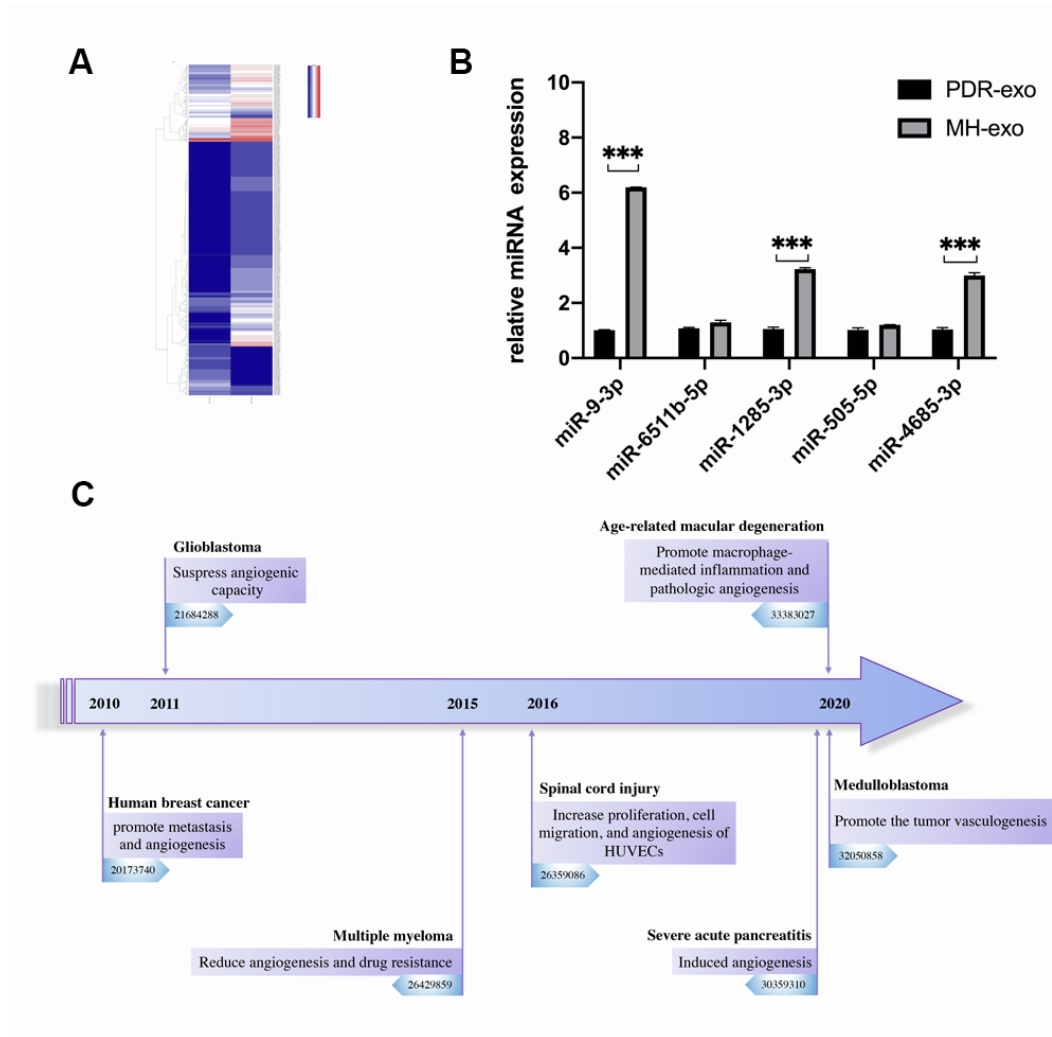

**Supplementary Figure 2 Exosomal miR-9-3p was markedly upregulated in the vitreous humor of PDR**

(A) Heat map indicated that 82 miRNAs were up-regulated and 352 miRNAs were downregulated in the PDR-exo compared with the MH-exo. (B) RT-qPCR validated the expression level of top 5 upregulated exosomal miRNAs in the vitreous humor of PDR compared to MH patients. \*\*\* $p < 0.001$ ,  $n = 3$ . (C) Timeline highlighting the advances in miR-9-3p. From being reported to promote angiogenesis in human breast cancer in 2010, there has been advances on the physical characteristics and biofunction of miR-9-3p in multiple diseases.

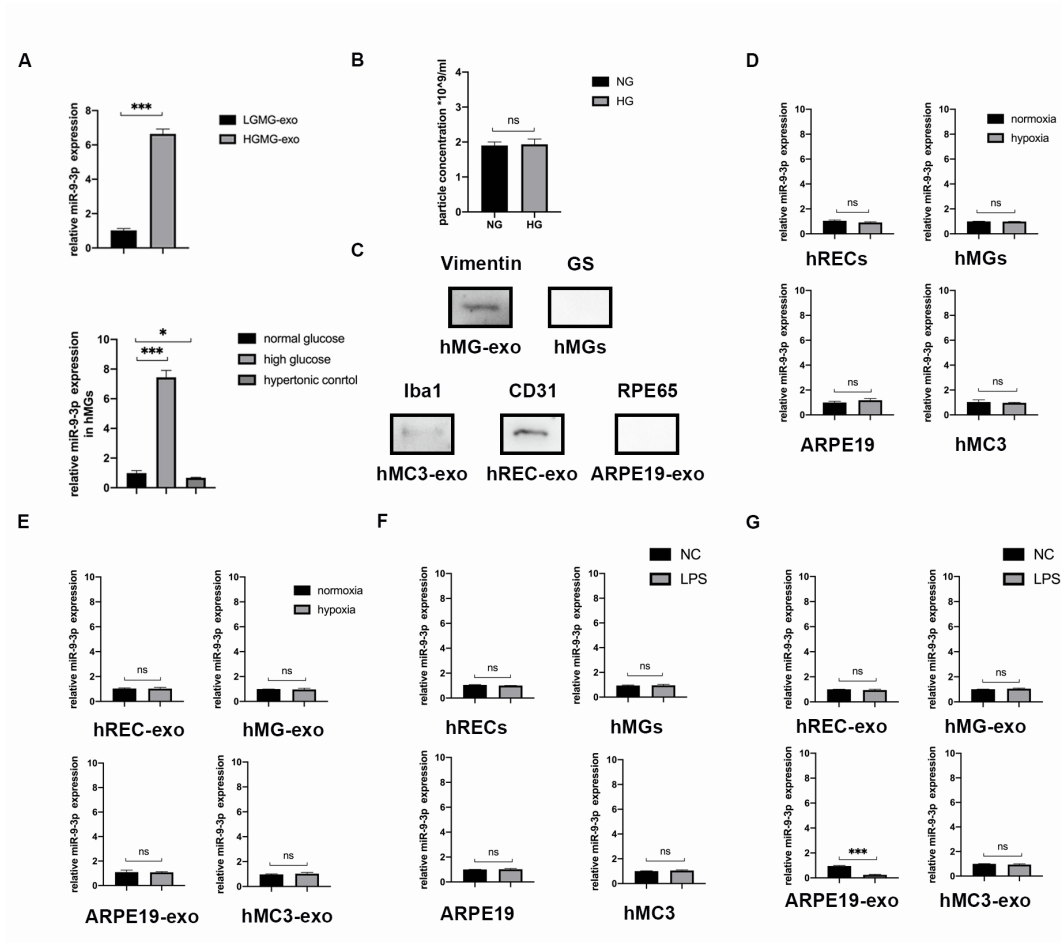

### Supplementary Figure 3 Expression pattern of miR-9-3p in multiple retinal cell types

(A) Upper panel: RT-qPCR results validated that the expression level of miR-9-3p was higher in HGMG-exo than in LGMG-exo. Lower panel: Hyperosmolar status induced by 5.5 mM glucose and 24.5 mM mannitol did not alter the expression level of miR-9-3p in hMGs. (B) Nanoparticle tracking analysis confirmed that there was no difference between the particle concentration of vesicles secreted from hMGs under low (5.5mM) and high glucose (30mM). (C) Specific cell marker in cell derived exosomes as detected by western blot. Vimentin and Glutamine synthesis in müller cell derived exosomes, Iba1 in human microglial hMC3 cell derived exosomes, CD31 in endothelial cell in hRECs derived exosomes, and RPE65 in ARPE19 derived exosomes was detected. (D)-

(E) The miR-9-3p expression in four cell types or cell derived exosomes under hypoxia environment (1.5%  $O_2$ ). (F)-(G) Under inflammation condition, the miR-9-3p expression was significantly downregulated in ARPE19 derived exosomes and maintain the same in the other three cell types. \*\*\* $p < 0.001$ .

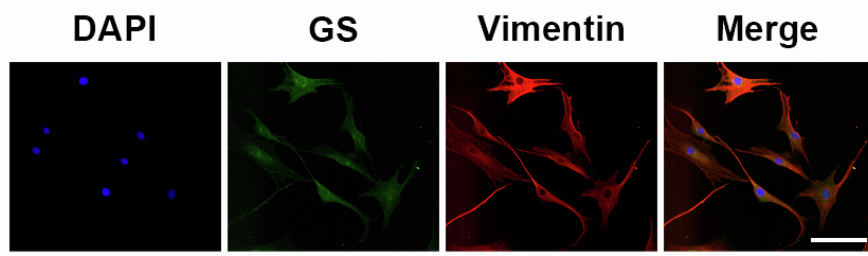

**Supplementary Figure 4 Validation of primarily cultured mMGs at passage 1**

Immunocytochemistry confirmed that expressions of vimentin and glutamine synthetase (GS) in MG. Scale bar = 20  $\mu\text{m}$ .

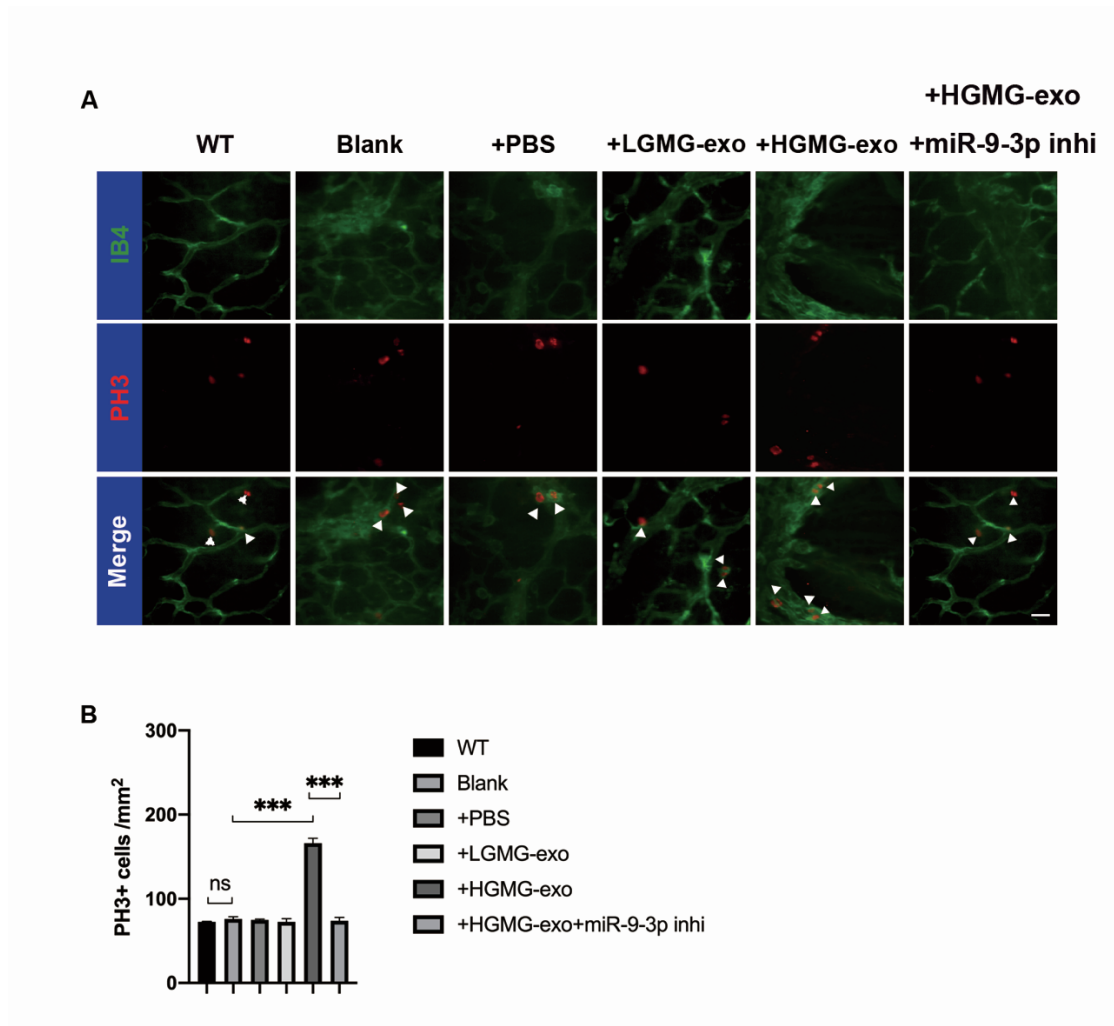

**Supplementary Figure 5 PH3 immunofluorescence is underpowered to detect endothelial proliferation in OIR model**

(A)-(B) Compared with normal control, no significant increase was observed in OIR-blank or OIR-PBS group using PH3 immunofluorescence ( $p > 0.05$ )

**Supplementary Table 1 Vitreous specimens were harvested for exosomal sequencing from 10 PDR patients and 15 sex-age matched MH patients**

|       | <b>Sex</b> | <b>Age (Years)</b> | <b>Volume of collected vitreous humor</b> | <b>Operation type</b> |
|-------|------------|--------------------|-------------------------------------------|-----------------------|
| PDR1  | Male       | 58                 | 2ml                                       | pars plana vitrectomy |
| PDR2  | Female     | 37                 | 2ml                                       | pars plana vitrectomy |
| PDR3  | Female     | 48                 | 2ml                                       | pars plana vitrectomy |
| PDR4  | Male       | 51                 | 2ml                                       | pars plana vitrectomy |
| PDR5  | Female     | 61                 | 2ml                                       | pars plana vitrectomy |
| PDR6  | Male       | 58                 | 2ml                                       | pars plana vitrectomy |
| PDR7  | Male       | 62                 | 2ml                                       | pars plana vitrectomy |
| PDR8  | Female     | 61                 | 2ml                                       | pars plana vitrectomy |
| PDR9  | Male       | 59                 | 2ml                                       | pars plana vitrectomy |
| PDR10 | Female     | 63                 | 2ml                                       | pars plana vitrectomy |
| MH1   | Male       | 51                 | 2ml                                       | pars plana vitrectomy |
| MH2   | Female     | 63                 | 2ml                                       | pars plana vitrectomy |
| MH3   | Female     | 64                 | 2ml                                       | pars plana vitrectomy |
| MH4   | Male       | 65                 | 2ml                                       | pars plana vitrectomy |
| MH5   | Male       | 61                 | 2ml                                       | pars plana vitrectomy |
| MH6   | Female     | 57                 | 2ml                                       | pars plana vitrectomy |
| MH7   | Male       | 46                 | 2ml                                       | pars plana vitrectomy |
| MH8   | Male       | 61                 | 2ml                                       | pars plana vitrectomy |
| MH9   | Female     | 55                 | 2ml                                       | pars plana vitrectomy |
| MH10  | Male       | 51                 | 2ml                                       | pars plana vitrectomy |
| MH11  | Male       | 61                 | 2ml                                       | pars plana vitrectomy |
| MH12  | Male       | 60                 | 2ml                                       | pars plana vitrectomy |
| MH13  | Female     | 49                 | 2ml                                       | pars plana vitrectomy |
| MH14  | Male       | 60                 | 2ml                                       | pars plana vitrectomy |
| MH15  | Female     | 62                 | 2ml                                       | pars plana vitrectomy |



**Supplementary Table 2 Clinic features of 65 PDR patients and 63 sex-age matched**

**MH patients.**

| <b>Characteristic</b> | <b>Number</b> |           |
|-----------------------|---------------|-----------|
|                       | <b>PDR</b>    | <b>MH</b> |
| <b>Age (Years)</b>    |               |           |
| <b>45-49</b>          | <b>10</b>     | <b>11</b> |
| <b>50-54</b>          | <b>18</b>     | <b>18</b> |
| <b>55-59</b>          | <b>22</b>     | <b>20</b> |
| <b>60-65</b>          | <b>15</b>     | <b>14</b> |
| <b>Gender</b>         |               |           |
| <b>Male</b>           | <b>32</b>     | <b>33</b> |
| <b>Female</b>         | <b>33</b>     | <b>30</b> |

**Supplementary Table 3 Total exosomal protein collected from PDR and MH patients**

| <b>Characteristics</b>             | <b>Replica 1</b> |             | <b>Replica 2</b> |             | <b>Replica 3</b> |             |
|------------------------------------|------------------|-------------|------------------|-------------|------------------|-------------|
|                                    | <b>PDR</b>       | <b>MH</b>   | <b>PDR</b>       | <b>MH</b>   | <b>PDR</b>       | <b>MH</b>   |
| <b>Number</b>                      | <b>21</b>        | <b>21</b>   | <b>21</b>        | <b>21</b>   | <b>23</b>        | <b>21</b>   |
| <b>Volume (ml)</b>                 | <b>42</b>        | <b>42</b>   | <b>42</b>        | <b>42</b>   | <b>46</b>        | <b>42</b>   |
| <b>Total exosomal protein (ug)</b> | <b>60.0</b>      | <b>59.7</b> | <b>61.9</b>      | <b>60.8</b> | <b>67.2</b>      | <b>60.6</b> |

**Supplementary Table 4 RNA sequence of miR-9-3p mimic, inhibitor, mimic nc and inhibitor nc**

| <b>Oligonucleotide</b> | <b>Forward</b>             | <b>Rerverse</b>            |
|------------------------|----------------------------|----------------------------|
| miR-9-3p mimic         | AUAAAGCUAGAUACCGAAA<br>GU  | ACUUUCGGUUAUCUAGCUU<br>UAU |
| miR-9-3p inhibitor     | ACUUUCGGUUAUCUAGCUUU<br>AU | CAGUACUUUUGUGUAGUAC<br>AAA |
| Mimic-nc               | UUUGUACUACACAAAAGUAC<br>UG |                            |
| Inhi-nc                | CAGUACUUUUGUGUAGUACA<br>AA |                            |
